# Supplementary material
Source: PubMed Central journal article supplement (PMC4972274)
Supplement: supp_pp.16.00421_00421SupplementalFig1.pdf [file supp_pp.16.00421_00421SupplementalFig1.pdf]

**Supplemental Figure S1**

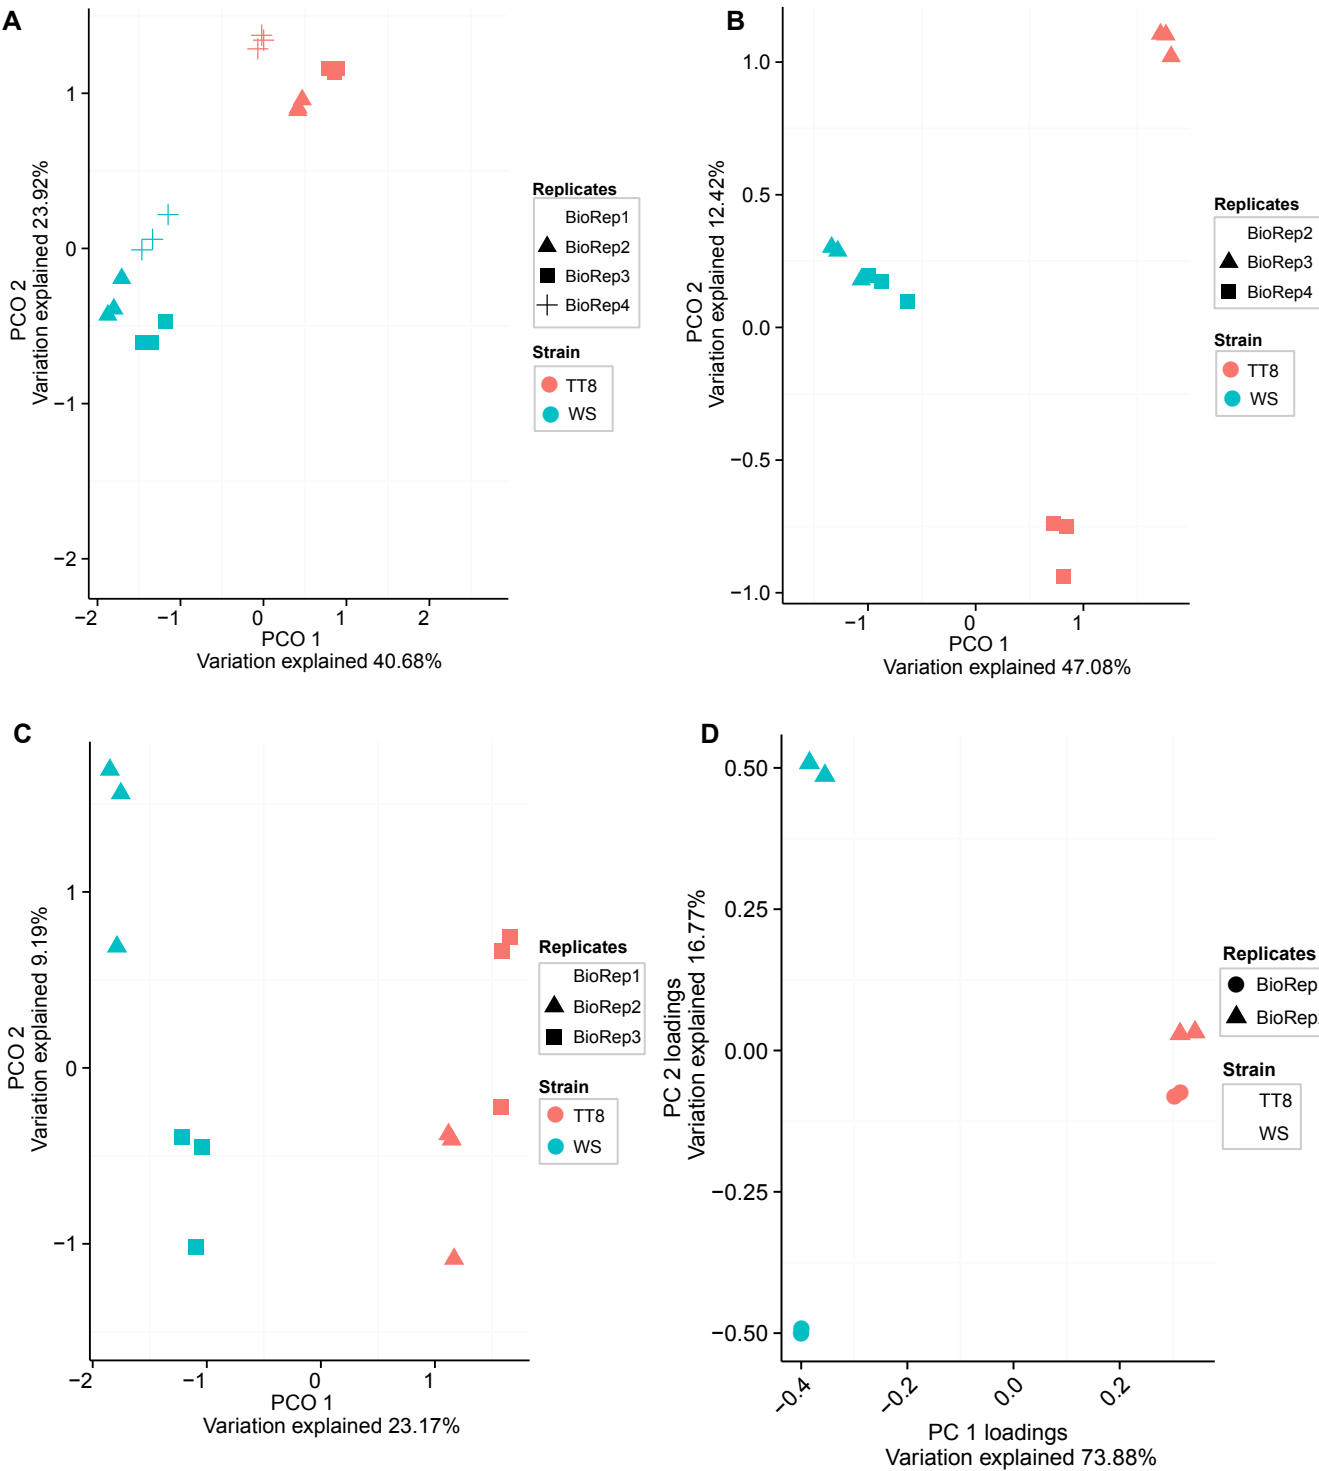

**Supplemental Figure S1. Exploratory data analysis.** Ordination plots using principal coordinates analysis depicting similarity in metabolic profiles within biological replicates and differences between genotypes in **(A)** *tt8* (Ws) and WT (Ws), **(B)** *tt8* (Ws) and WT (Ws) after removing one outlier (BioRep1) biological replicate from each genotype, and **(C)** *tt8* (Ler) and WT (Ler). Orange and blue shaded points represent *tt8* and wild-type, respectively. **(D)** Principal components analysis of microarray-based gene expression profiles of *tt8* (Ws) and WT (Ws).
