# Supplementary material
Source: PubMed Central journal article supplement (PMC4972274)
Supplement: supp_pp.16.00421_00421SupplementalFig2.pdf [file supp_pp.16.00421_00421SupplementalFig2.pdf]

## Supplemental Figure S2

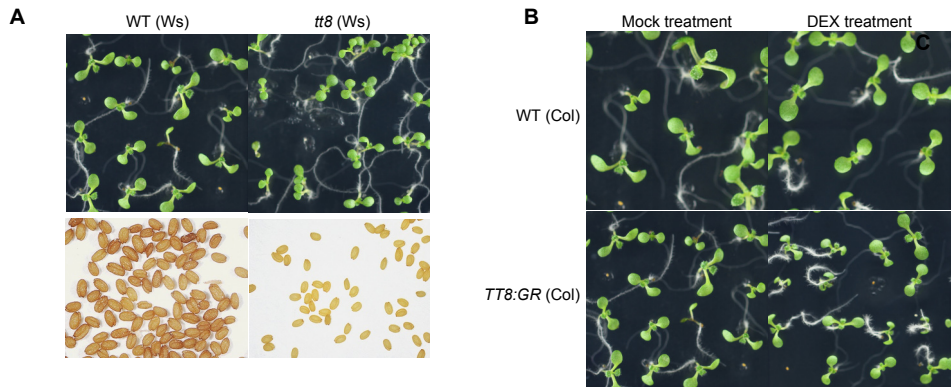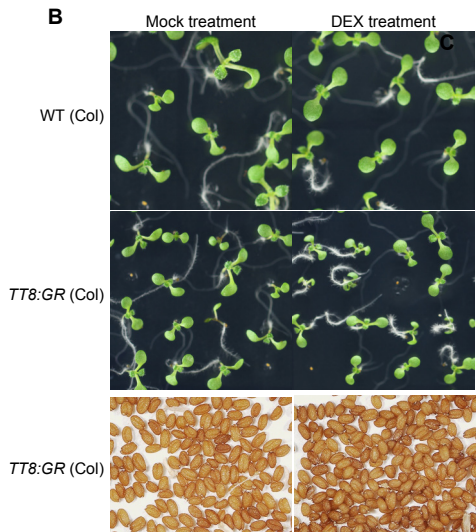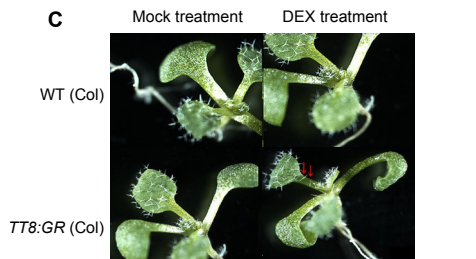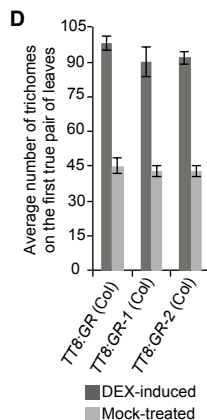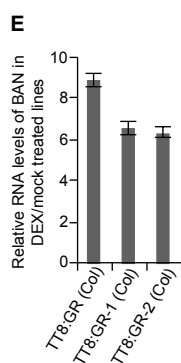

**Supplemental Figure S2.** Phenotypes of mutant in *Ws* background and inducible overexpression lines in *Col* background. **(A)** The first row shows the germination of *tt8* (*Ws*) and WT (*Ws*). The second row shows yellow seed coloration for *tt8* (*Ws*) due to the absence of brown pigmentation, compared to WT (*Ws*). **(B)** DEX and mock-treated wild-type and *TT8:GR* lines in *Col* background. DEX-induced *TT8:GR* (*Col*) overexpression and mock-treated *TT8:GR* (*Col*) lines show improved germination compared to WT (*Col*). DEX treatment has no effect on the germination of wild-type. The third row shows the seeds of DEX-induced *TT8:GR* (*Col*) overexpression line having a darker brown color compared to mock-treated *TT8:GR* (*Col*) line. **(C)** Trichome formation in DEX and mock-treated *TT8:GR* (*Col*) and WT (*Col*) lines. DEX-induced *TT8:GR* (*Col*) overexpression lines show higher trichome than mock-treated *TT8:GR* (*Col*) lines. **(D)** Number of trichomes in DEX-induced overexpression and mock-treated *TT8:GR* (*Col*) lines. Total number of trichomes were counted on adaxial side of first true pair of leaves of 7-day old seedlings. Data are given as mean  $\pm$ SD ( $n > 15$ ). **(E)** Quantitative real-time PCR results show the relative expression level of BAN in DEX-treated lines with respect to mock-treated lines. The three independent DEX-induced *TT8:GR* (*Col*) overexpression lines that showed highest up-regulation BAN are shown. DEX-induced *TT8:GR* (*Col*) overexpression lines that showed the highest BAN expression was selected for this study.
