# Supplementary material
Source: PubMed Central journal article supplement (PMC4972274)
Supplement: supp_pp.16.00421_00421SupplementalFig3.pdf [file supp_pp.16.00421_00421SupplementalFig3.pdf]

**Supplemental Figure S3**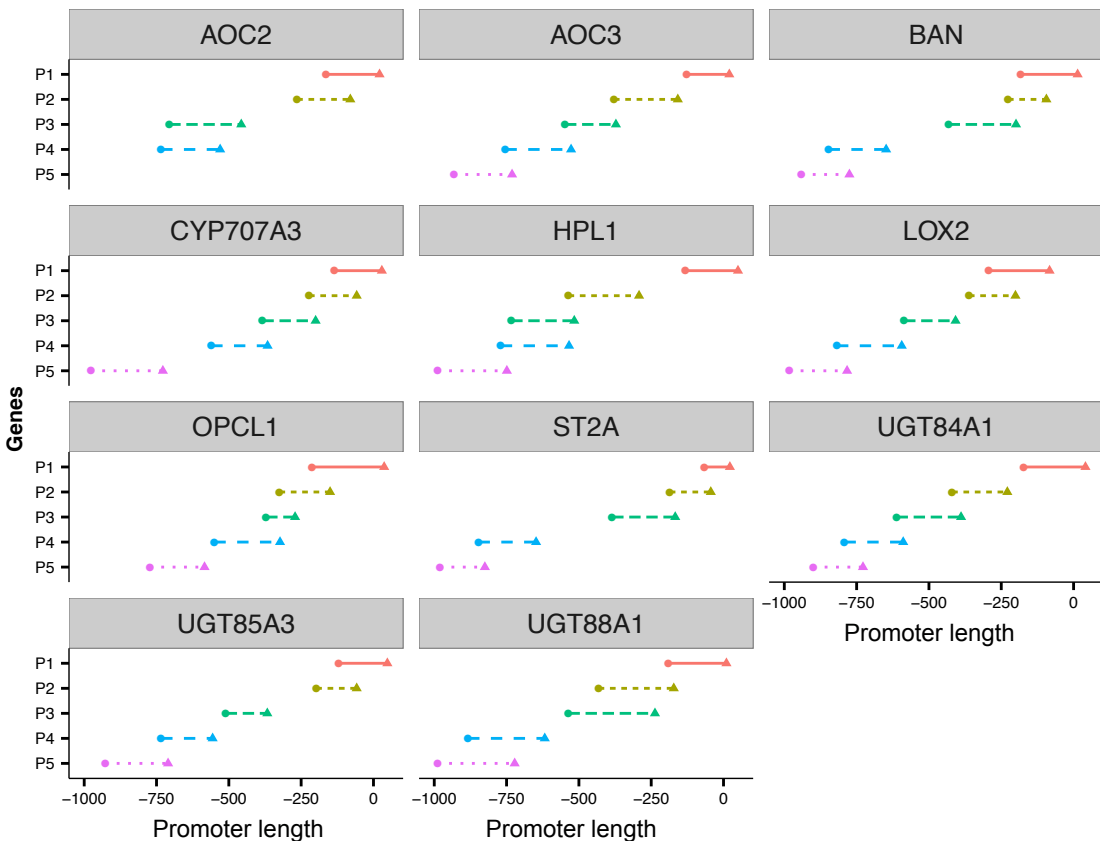**Supplemental Figure S3.** Location of the promoter fragments of genes tested using ChIP-PCR in DEX-induced *TT8:GR* (Col) overexpression lines and mock-treated *TT8:GR* (Col) lines.
