# Supplementary material
Source: PubMed Central journal article supplement (PMC4972274)
Supplement: supp_pp.16.00421_00421SupplementalFig4.pdf [file supp_pp.16.00421_00421SupplementalFig4.pdf]

## Supplemental Figure S4

### A Wild-type Col lines

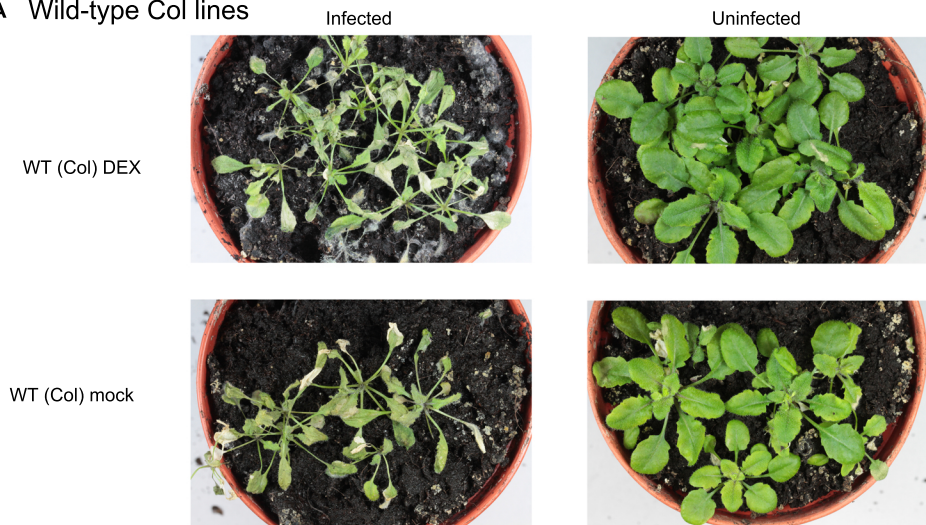

### B

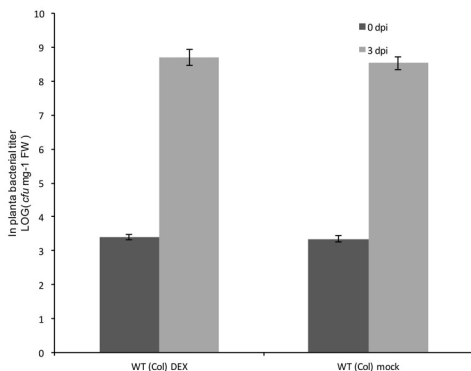

**Supplemental Figure S4.** *Pst* DC3000 infection on WT (Col) lines with DEX and mock treatment. **(A)** Diseased state of DEX-treated WT (Col) and mock-treated WT (Col) are similar. 5-weeks old Arabidopsis plants were spray inoculated with a suspension of *Pst* DC3000 (108 CFU) or had mock treatment. The images of plants showing disease symptom were taken 3 days after inoculation. **(B)** Bacterial growth in leaves of DEX-treated WT (Col) and mock-treated WT (Col) lines, 3 days after spray inoculation of *Pst* DC3000 suspension or mock treatment. Results are shown as mean $\pm$ SEM based on three replications (P-value <0.05).
