# Supplementary material
Source: PubMed Central journal article supplement (PMC4972274)
Supplement: supp_pp.16.00421_00421SupplementalFig6.pdf [file supp_pp.16.00421_00421SupplementalFig6.pdf]

## Supplemental Figure S6 Mock and DEX treated wild-type (Col) lines

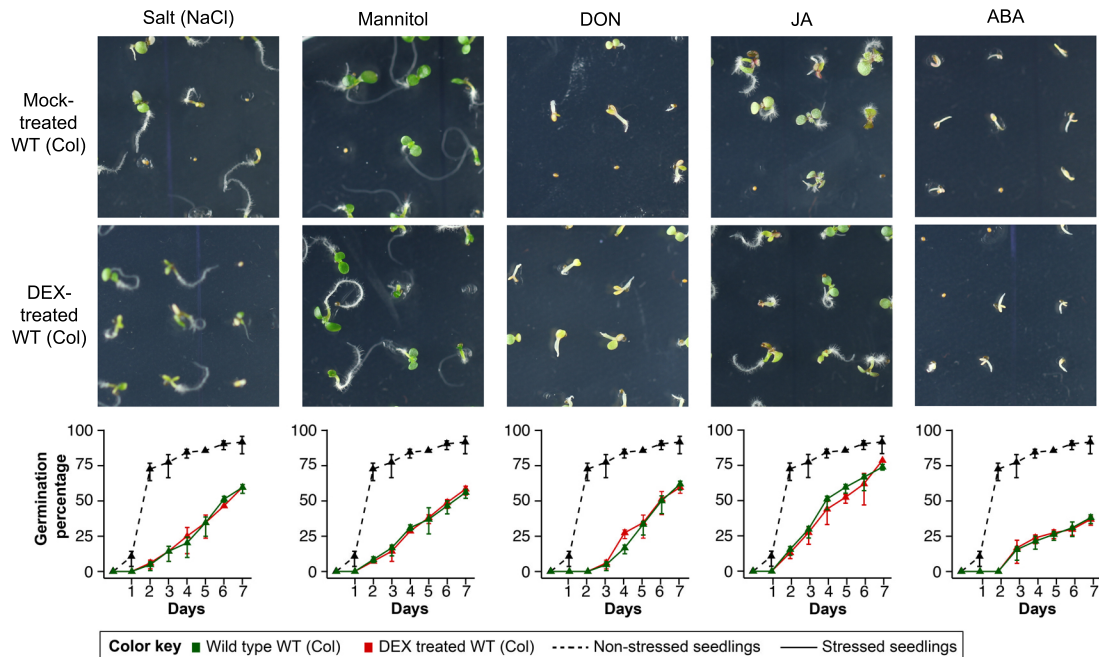

**Figure S6. Under multiple stress conditions, germination of Arabidopsis DEX and mock WT (Col) remains similar.** WT (Col) seeds treated with 30  $\mu\text{M}$  DEX or equivalent volume of ethanol as mock treatment were sown directly on 1xMS (2% sucrose and 0.6% phytoagar) agar plates. The conditions were: 150 mM NaCl, 250mM mannitol, 10 mg  $\text{kg}^{-1}$  DON, 100  $\mu\text{M}$  MeJA and 1 $\mu\text{M}$  ABA. Number of seeds germinating (3 biological replicates with 28 seeds sown for each replicate) each day was calculated under more severe stress conditions of 200mM NaCl, 500mM mannitol, 20 mg  $\text{kg}^{-1}$  DON, 200  $\mu\text{M}$  MeJA and 10 $\mu\text{M}$  ABA. Images of 6-day old seedlings were captured for both mock-treated WT (Col) and DEX-treated WT (Col) lines. Non-stressed DEX and mock WT (Col) seedlings have similar germination rates and are shown as black colored lines. Germination rates are shown as mean $\pm$ SD.
