# Supplementary material
Source: PubMed Central journal article supplement (PMC4972274)
Supplement: supp_pp.16.00421_00421SupplementalFig7.pdf [file supp_pp.16.00421_00421SupplementalFig7.pdf]

# Supplemental Figure S7 WT and *tt8* in Col background

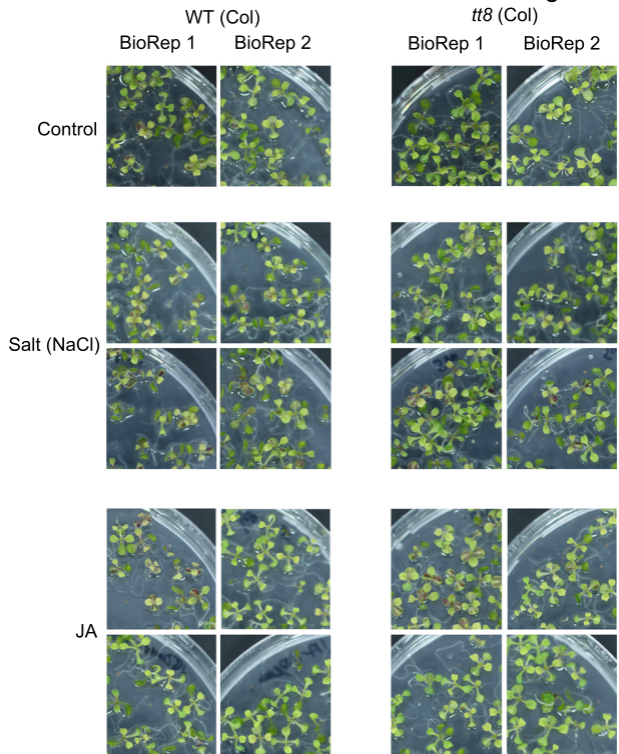

**Supplemental Figure S7. Under multiple stress conditions, *tt8* (Col) does not have any distinguishable phenotype compared to WT (Col). The conditions were: 150 mM NaCl and 100  $\mu$ M MeJA.**
