# Supplementary material
Source: PubMed Central journal article supplement (PMC4972274)
Supplement: supp_pp.16.00421_00421SupplementalFig8.pdf [file supp_pp.16.00421_00421SupplementalFig8.pdf]

# Supplemental Figure S8 WT and *tt8* in Ler background

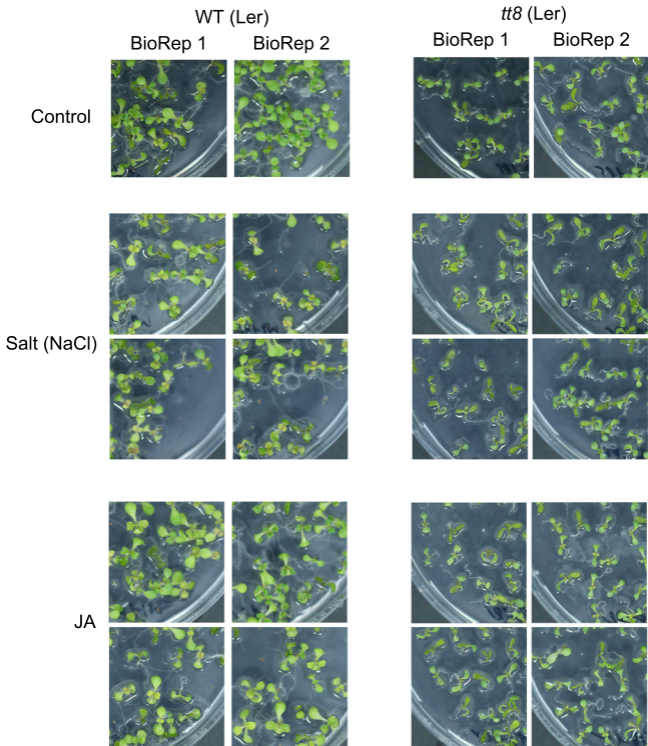

**Supplemental Figure S8. Compared to WT (Ler), *tt8* (Ler) is sensitive to multiple stresses.** The conditions were: 150 mM NaCl and 100  $\mu$ M MeJA.
